# Supplementary material for: Immunogenic Human Papillomavirus Pseudovirus-Mediated Suicide-Gene Therapy for Bladder Cancer
Source: PubMed Central journal article supplement (PMC4964499; doi:10.3390/ijms17071125), 2016-07-14
Supplement: ijms-17-01125-s001.pdf [file ijms-17-01125-s001.pdf]

## Supplementary Materials: Immunogenic Human Papillomavirus Pseudovirus-Mediated Suicide-Gene Therapy for Bladder Cancer

Rim Hojeij, Sonia Domingos-Pereira, Marianne Nkosi, Dalila Gharbi, Laurent Derré, John T. Schiller, Patrice Jichlinski and Denise Nardelli-Haeffliger

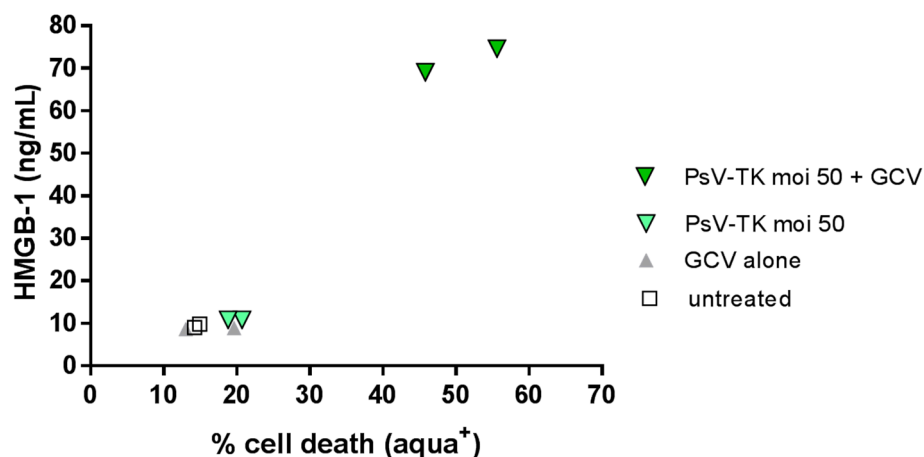

**Figure S1.** High-Mobility Group Box-1 (HMGB-1) secretion upon pseudovirions encoding for thymidine kinase (PsV-TK)/Ganciclovir (GCV) killing of MB49 cells in vitro: HMGB-1 (ng/mL) was measured by ELISA in the supernatant of MB49-cells infected 5 days earlier with PsV-TK at multiplicity of infection (moi) 50 with (dark green triangle) or without GCV (light-green triangle), or receiving GCV alone (grey triangle) or left untreated (white square). Results were plotted against the respective percentage (%) of cell death induced as measured by flow cytometry (aqua<sup>+</sup> cells).

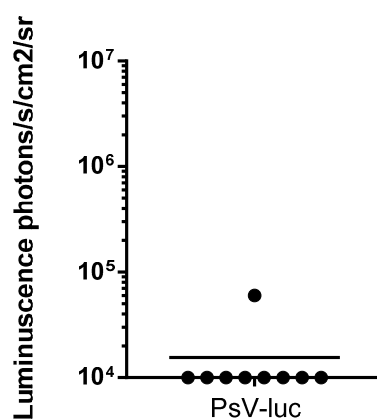

**Figure S2.** Intravesical (IVES) instillation of Pseudovirions encoding for luciferase (PsV-luc) is inefficient in absence of N9 prior treatment. Day 5 MB49-bladder tumor bearing mice received IVES instillation of 10<sup>6</sup> transducing relative light units (TRLU) of PsV-luc without any pretreatment. Quantification of bladder/ tumor luminescence 48 h.
